# Supplementary material for: The Effect of Osteoporosis on Complications and Reoperation Rates After Surgical Management of Adult Thoracolumbar Spinal Deformity: A Systematic Review and Meta Analysis
Source: PubMed Central journal article supplement — Global Spine J. 2024 Apr 26;14(8):2420–39. doi: 10.1177/21925682241250031 (PMC11528736; doi:10.1177/21925682241250031), 2024-04-26

## Complication Rate

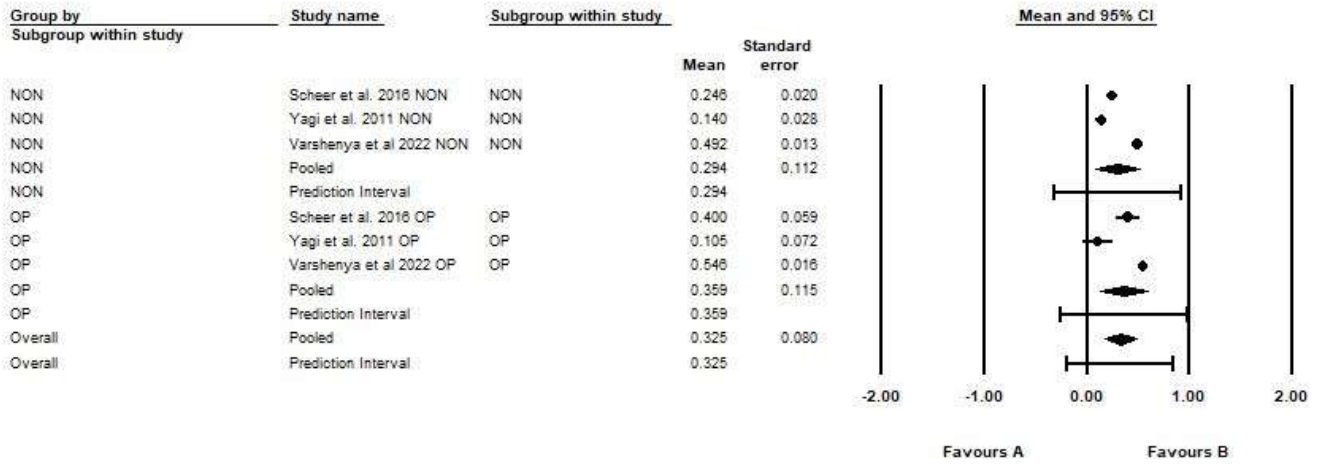

## Fusion Rate

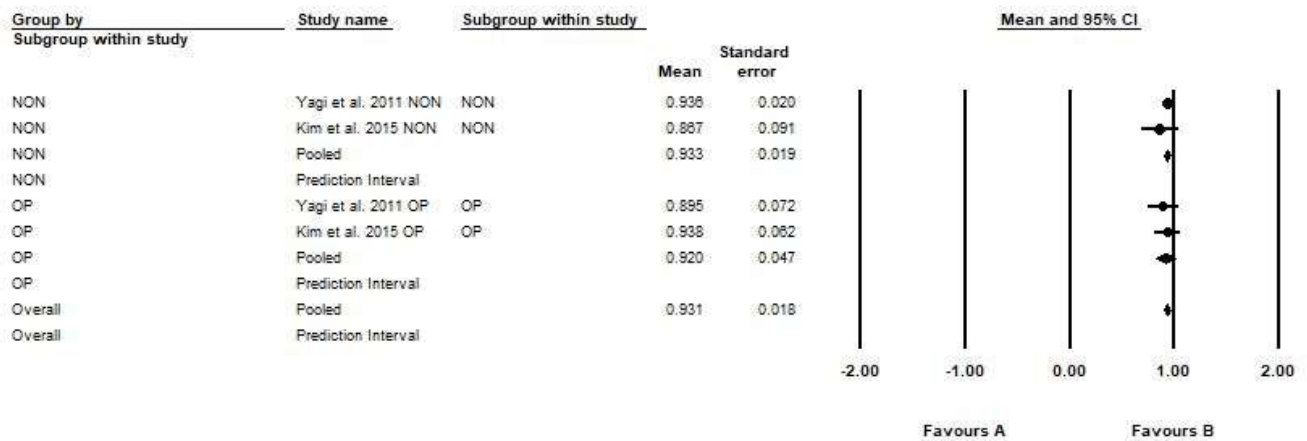

## Neural Injury Rate

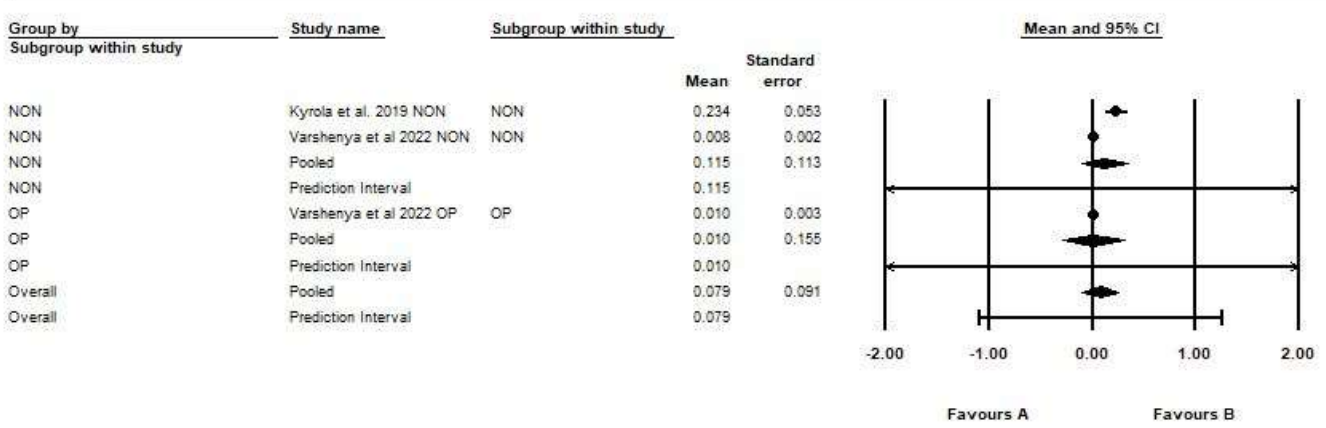

## PJK Rate

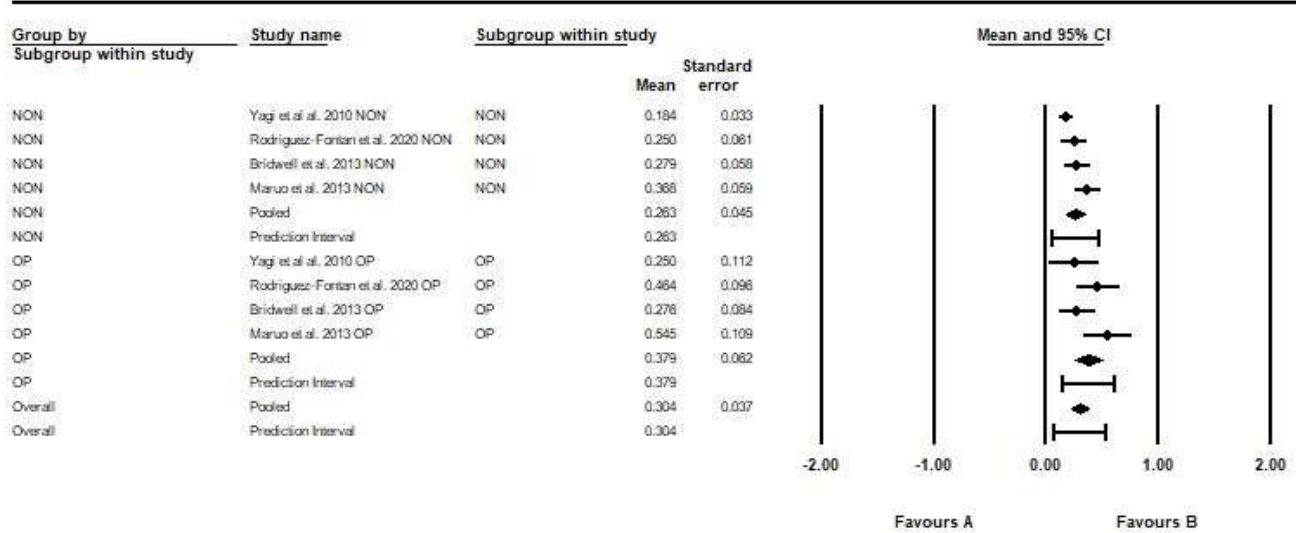

## PJF RATE

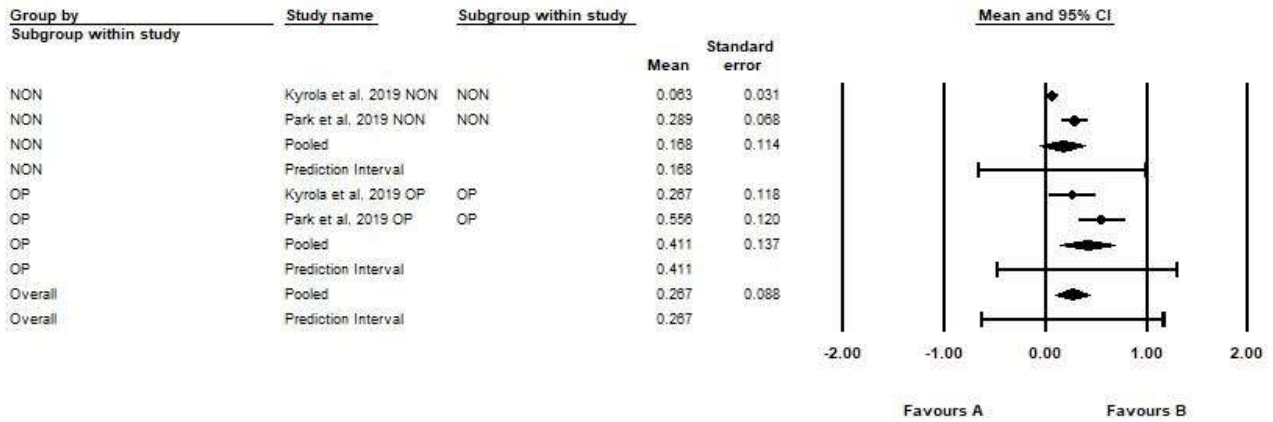

## Revision Surgery RATE

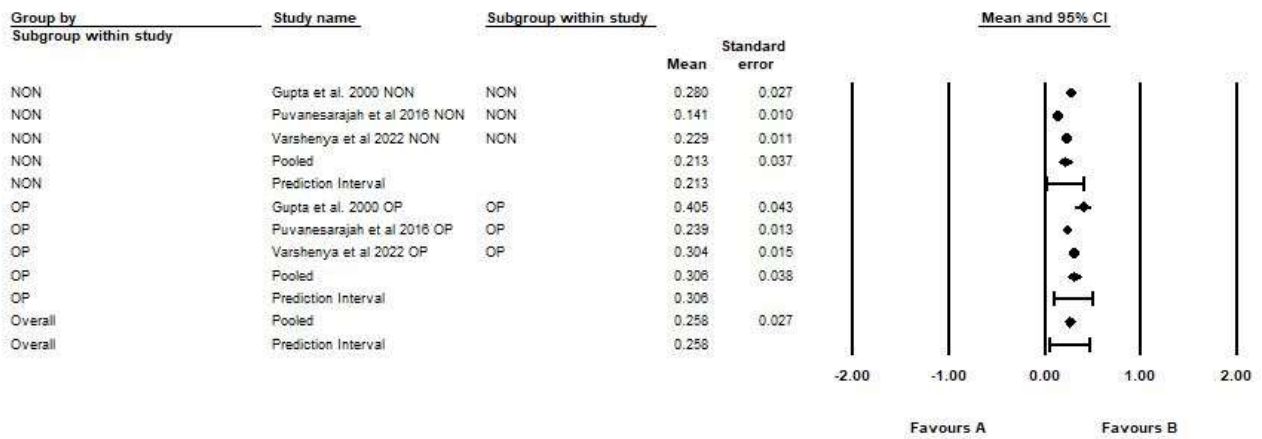

## Rod Breakage RATE

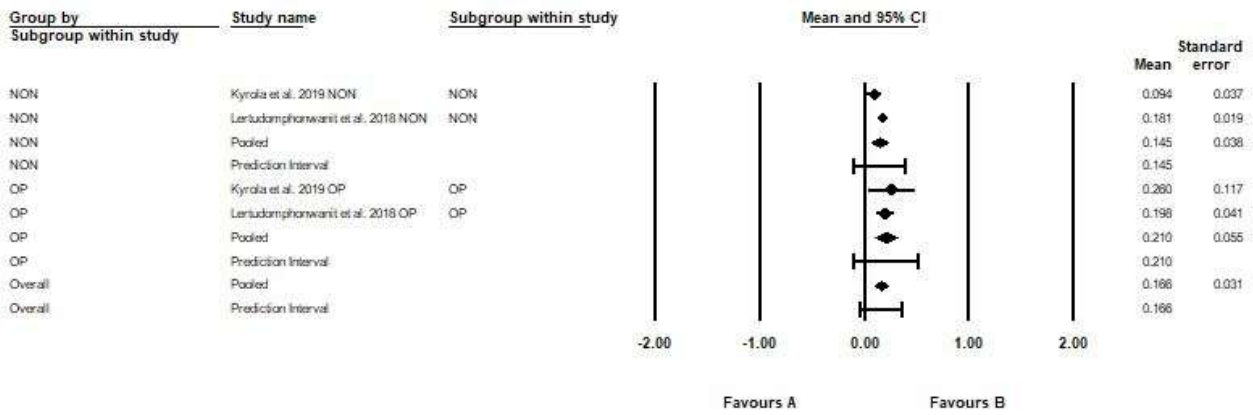

## 30 D Readmission RATE

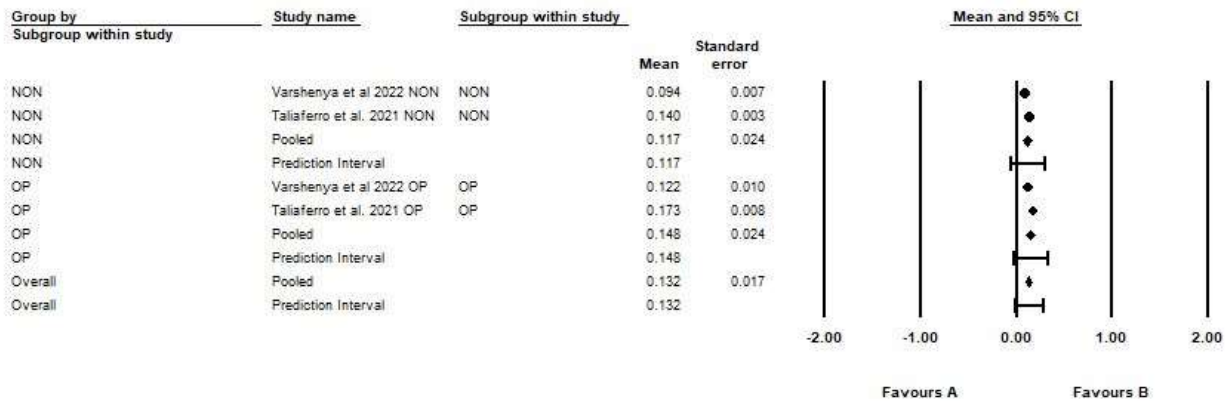

# Screw Loosening RATE

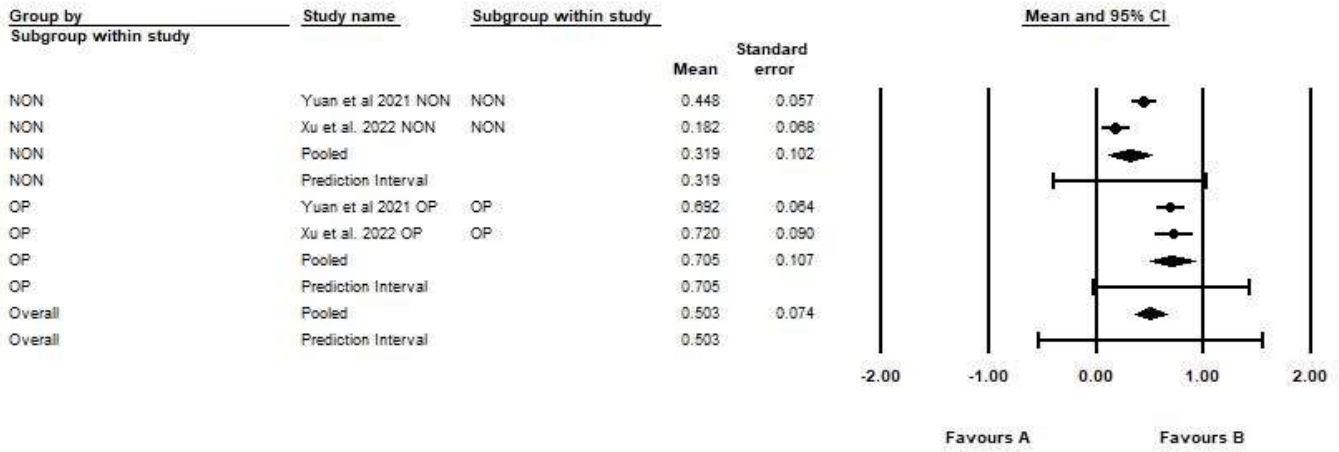

Supplement: sj-pdf-1-gsj-10.1177_21925682241250031.pdf [file sj-pdf-1-gsj-10.1177_21925682241250031.pdf]
